# Supplementary material for: Dendritic oligothiophene bearing perylene bis(dicarboximide) groups as an active material for photovoltaic device
Source: Royal Society of Chemistry journal article supplement (doi:10.1039/b819008a), 2009-01-01
Supplement: b819008a.pdf [file b819008a.pdf]

## Supporting Information

### Dendritic Oligothiophene Bearing Perylene Bis(dicarboximide) Groups as an Active Material for Photovoltaic Device

Yutaka Ie, Toshihiko Uto, Nobuhiro Yamamoto, and Yoshio Aso\*

*The Institute of Scientific and Industrial Research, Osaka University, Ibaraki, Osaka 567-0047, Japan.*

#### Table of Contents

|                                   |               |
|-----------------------------------|---------------|
| <b>General Information</b>        | <b>S1–S2</b>  |
| <b>Materials</b>                  | <b>S2</b>     |
| <b>Experimental Procedures</b>    | <b>S3–S5</b>  |
| <b>Representative NMR Spectra</b> | <b>S6</b>     |
| <b>Computational Details</b>      | <b>S7–S11</b> |
| <b>UV-vis Absorption Spectra</b>  | <b>S12</b>    |
| <b>MALDI-TOF mass</b>             | <b>S12</b>    |
| <b>Device Fabrication</b>         | <b>S13</b>    |
| <b>AFM Images</b>                 | <b>S14</b>    |
| <b>References</b>                 | <b>S14</b>    |

**General Information.** Column chromatography was performed on silica gel, KANTO Chemical silica gel 60N (63–210  $\mu\text{m}$ ), or on aluminium oxide, MERCK aluminium oxide 90 standardized. TLC plates were visualized with UV light. Preparative gel-permeation chromatography (GPC) was performed on Japan Analytical Industry LC-908 equipped with JAI-GEL 3H/4H columns.

Melting points are uncorrected.  $^1\text{H}$  and  $^{13}\text{C}$  NMR spectra were recorded on a JEOL JMN-400 spectrometer in  $\text{CDCl}_3$  with tetramethylsilane as an internal standard. Data are reported as follows: chemical shift in ppm ( $\delta$ ), multiplicity (s = singlet, d = doublet, t = triplet, q = quartet, m =

multiplet), coupling constant (Hz), and integration. Mass spectra were obtained on Shimadzu AXIMA-TOF. UV-visible spectra were recorded on Shimadzu UV-3100PC. Fluorescence spectra were recorded using a Fluoromax-2 spectrometer in the photo-counting mode equipped with a Hamamatsu R928 photomultiplier. The bandpass for the emission spectra was 1.0 nm. All spectra were obtained in spectrograde solvents. Cyclic voltammetry was carried out on a BAS ALC 620C voltammetric analyzer at a scan rate of 100 mV/s in *o*-dichlorobenzene/CH<sub>3</sub>CN (9/1) containing 0.1 M tetrabutylammonium hexafluorophosphate (TBAPF<sub>6</sub>) as supporting electrolyte, using a platinum button as the working electrode, a platinum wire as the counter electrode, and a Ag/AgNO<sub>3</sub> as the reference electrode, respectively. Atomic force microscopy (AFM) measurements were carried out using Shimadzu SPM-9600.

Elemental analyses were performed on Perkin Elmer LS-50B by the Elemental Analysis Section of Materials Analysis Center, ISIR, Osaka University.

**Materials.** All reactions were carried out under a nitrogen atmosphere. Solvents of the highest purity grade were used as received. Unless stated otherwise, all reagents were purchased from commercial sources and used without purification.

*N*-(10-Nonadecyl)-3,4,9,10-perylenetetracarboxylic acid 3,4-anhydride-9,10-imide (**7**)<sup>1</sup> and 5,5''-bis(tri-*n*-butylstannyl)-3,3''-dihexyl-2,2':5',2'':5'',2''':5'''-quaterthiophene (**4**)<sup>2</sup> were prepared by reported procedures, and <sup>1</sup>H NMR data of these compounds were in agreement with those previously reported.

## Experimental Procedures

### Scheme S1. Synthesis of 1 and 2

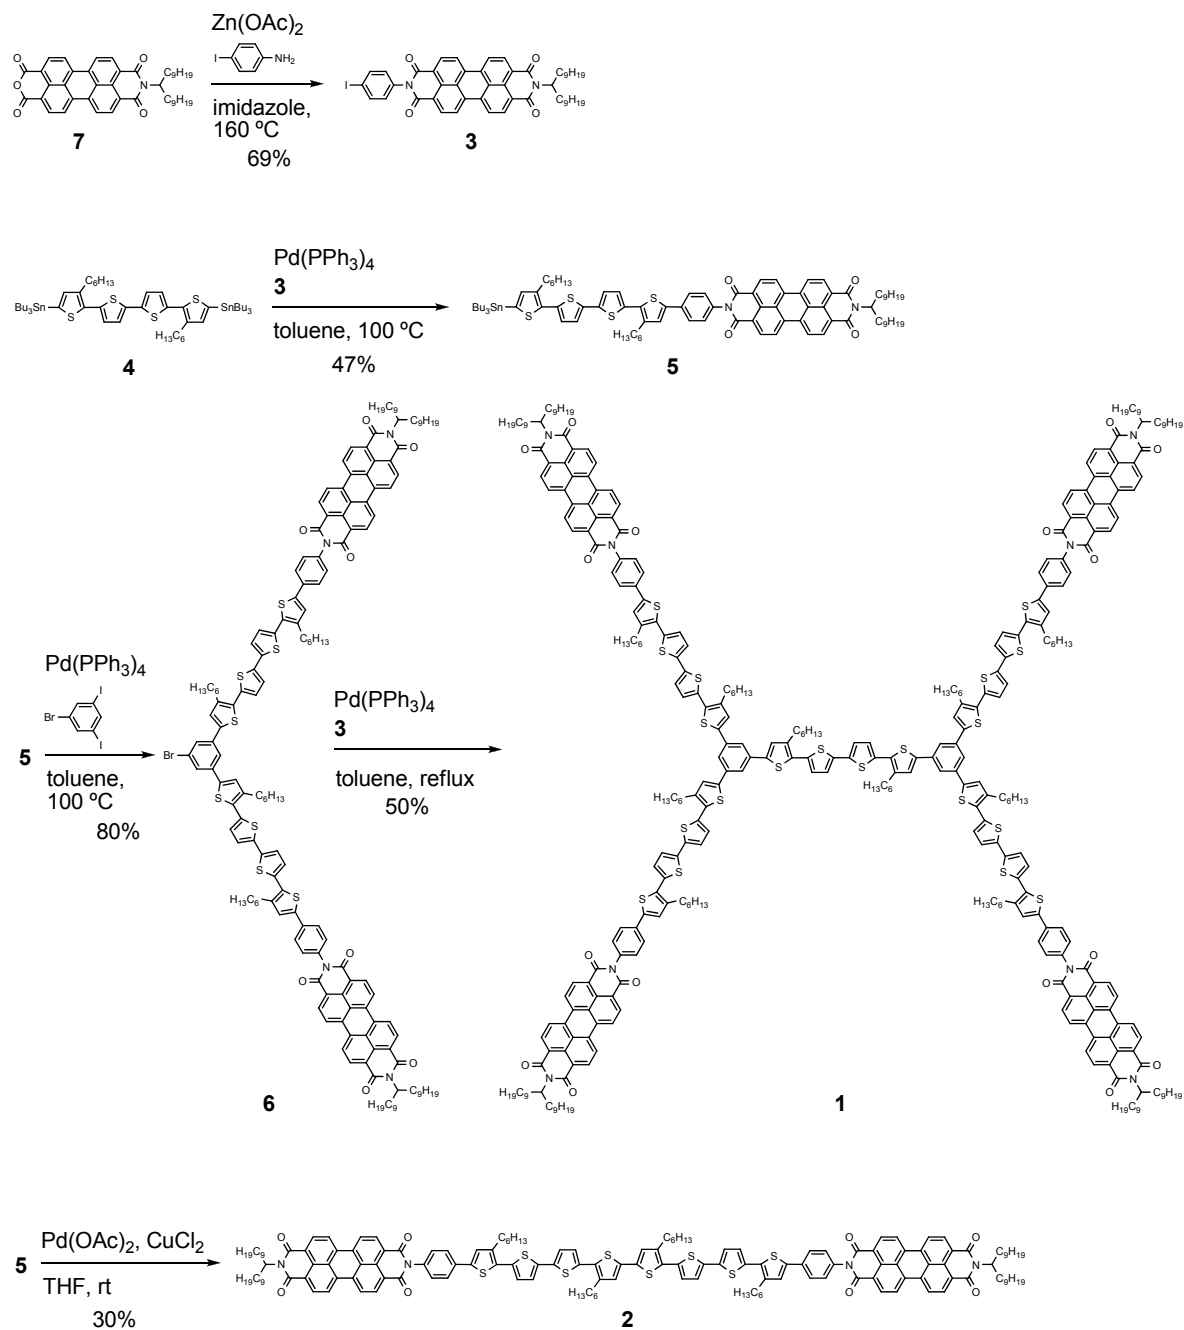

#### Compound 3.

Compound **7** (2.20 g, 3.35 mmol), 4-iodoaniline (2.93 mg, 13.3 mmol),  $\text{Zn}(\text{OAc})_2$  (460 mg, 2.51 mmol), and imidazole (25 g, 368 mmol) were placed in a flask and degassed with nitrogen. The mixture was stirred at  $160\text{ }^\circ\text{C}$  for 2 h. After cooling to room temperature, the reaction mixture was purified by column chromatography on silica gel (hexane:EtOAc=1:2 ~ $\text{CHCl}_3$ ) to give **3** (2.02 g,

69%).

Red solid; Mp >300 °C; TLC  $R_f$  = 0.5 (CHCl<sub>3</sub>); <sup>1</sup>H NMR (CDCl<sub>3</sub>) δ 0.80–0.84 (m, 6H), 1.20–1.32 (m, 28H), 1.84–1.89 (m, 2H), 2.20–2.26 (m, 2H), 2.80–2.83 (m, 4H), 5.10–5.14 (m, 1H), 7.04–7.19 (m, 2H), 7.81–7.83 (m, 2H), 8.44–8.58 (m, 8H); <sup>13</sup>C NMR (CDCl<sub>3</sub>) δ 14.1, 22.6, 27.0, 29.3, 29.5, 31.9, 32.4, 54.9, 76.7, 94.6, 122.9, 123.0, 123.3, 126.2, 126.5, 129.4, 129.7, 130.6, 131.8, 134.0, 134.8, 135.1, 138.6, 163.2; MS (MALDI-TOF, 1,8,9-trihydroxy-anthracene matrix)  $m/z$  860.6 (M<sup>+</sup>, calcd 858.3); Anal. Calcd for C<sub>49</sub>H<sub>51</sub>N<sub>2</sub>O<sub>4</sub>: C, 68.53; H, 5.99; N, 3.26; Found: C, 68.63; H, 5.99; N, 3.11.

#### Compound 5.

Compound **3** (800 mg, 0.93 mmol), **4** (2.0 g, 1.86 mmol), and tetrakis(triphenylphosphine)palladium(0) (54 mg, 0.046 mmol) were placed in a test tube, dissolved with toluene (18 mL), and degassed with nitrogen. The mixture was refluxed for 2 h. After removal of the solvent under reduced pressure, the residue was purified by column chromatography on alumina (hexane/CHCl<sub>3</sub>=5:1~1:1) to give **5** (590 mg, 42%).

Red solid; Mp 213–216 °C; TLC  $R_f$  = 0.5 (hexane–CHCl<sub>3</sub>); <sup>1</sup>H NMR (CDCl<sub>3</sub>) δ 0.81–0.93 (m, 21H), 1.10–1.14 (m, 6H), 1.20–1.42 (m, 46H), 1.50–1.61 (m, 6H), 1.60–1.74 (m, 4H), 1.85–1.88 (m, 2H), 2.23–2.27 (m, 2H), 2.80–2.83 (m, 4H), 5.15–5.22 (m, 1H), 6.97 (d,  $J$  = 3.9 Hz, 1H), 7.08 (d,  $J$  = 3.8 Hz, 1H), 7.14 (d,  $J$  = 3.9 Hz, 1H), 7.15 (d,  $J$  = 3.6 Hz, 1H), 7.22 (s, 1H), 7.38 (d,  $J$  = 8.5 Hz, 2H), 7.78 (d,  $J$  = 8.5 Hz, 2H), 8.63–8.75 (m, 8H); MS (MALDI-TOF, 1,8,9-trihydroxyanthracene matrix)  $m/z$  1519.1 (M<sup>+</sup>, calcd 1518.6); Anal. Calcd for C<sub>160</sub>H<sub>169</sub>BrN<sub>4</sub>O<sub>8</sub>S<sub>8</sub>: C, 70.38; H, 7.30; N, 1.84; Found: C, 70.10; H, 7.33; N, 1.69.

#### Compound 6.

Compound **5** (760 mg, 0.50 mmol), 3,5-diiodobromobenzene (89 mg, 0.22 mmol), and tetrakis(triphenylphosphine)palladium(0) (19 mg, 0.0165 mmol) were placed in a test tube, dissolved with toluene (7 mL), and degassed with nitrogen. The mixture was stirred at 100 °C for 2 h. After removal of the solvent under reduced pressure, the residue was purified by column chromatography on silica gel (CHCl<sub>3</sub>) to give **6** (450 mg, 78%)

Dark-red solid; Mp 196–200 °C; TLC  $R_f$  = 0.4 (CHCl<sub>3</sub>); <sup>1</sup>H NMR (CDCl<sub>3</sub>) δ 0.81–0.85 (m, 12H), 0.91–0.94 (m, 12H), 1.20–1.44 (m, 80H), 1.68–1.74 (m, 8H), 1.85–1.93 (m, 4H), 2.23–2.26 (m, 4H), 2.78–2.83 (m, 8H), 5.15–5.22 (m, 2H), 7.09 (d,  $J$  = 3.9 Hz, 4H), 7.16 (d,  $J$  = 3.9 Hz, 2H), 7.17 (d,  $J$

= 3.9 Hz, 2H), 7.17 (s, 2H), 7.21 (s, 2H), 7.36 (d,  $J = 8.6$  Hz, 4H), 7.54–7.58 (m, 3H), 7.76 (d,  $J = 8.5$  Hz, 4H), 8.58–8.72 (m, 16H); MS (MALDI-TOF, 1,8,9-trihydroxyanthracene matrix)  $m/z$  2612.5 ( $M^+$ , calcd 2612.0) Anal. Calcd for  $C_{160}H_{169}BrN_4O_8S_8$ : C, 73.56; H, 6.52; N, 2.14; Found: C, 73.30; H, 6.52; N, 2.01.

#### Compound 1.

Compound **6** (270 mg, 0.10 mmol), **3** (45 mg, 0.04 mmol), and tetrakis(triphenylphosphine)palladium(0) (4 mg, 0.004 mmol) were placed in a test tube, dissolved with toluene (3 mL), and degassed with nitrogen. The mixture was refluxed for 15 h. After removal of the solvent under reduced pressure, the residue was first separated by column chromatography on silica gel ( $CHCl_3$ ), and then the fraction containing **2** was further purified by GPC ( $CHCl_3$ ) to give pure **1** (110 mg, 45%).

Dark-red solid; Mp 223–226 °C; TLC  $R_f = 0.1$  ( $CHCl_3$ );  $^1H$  NMR ( $CDCl_3$ )  $\delta$  0.81–0.95 (m, 54H), 1.21–1.41 (m, 172H), 1.63–1.73 (m, 20H), 1.88–1.93 (m, 8H), 2.19–2.14 (m, 8H), 2.70–2.76 (m, 20H), 5.05–5.11 (m, 4H), 6.91–7.04 (m, 30H), 7.21–7.23 (m, 8H), 7.32–7.34 (m, 6H), 7.58–7.60 (m, 8H), 8.26–8.47 (m, 32H); MS (MALDI-TOF, 1,8,9-trihydroxyanthracene matrix)  $m/z$  5560.8 ( $M^+$ , calcd 5559.3); Anal. Calcd for  $C_{348}H_{370}N_8O_{16}S_{20}$ : C, 75.15; H, 6.71; N, 2.01. Found: C, 74.87; H, 6.66; N, 2.02.

#### Compound 2.

Compound **5** (200 mg, 0.13 mmol),  $Pd(OAc)_2$  (3.00 mg, 0.013 mmol), and  $CuCl_2$  (36 mg, 0.26 mmol) were placed in a test tube, dissolved with toluene (3 mL), and degassed with nitrogen. The mixture was stirred at room temperature for 15 min. After removal of the solvent under reduced pressure, the residue was first separated by column chromatography on silica gel ( $CHCl_3$ ), and then the fraction containing **2** was further purified by GPC ( $CHCl_3$ ) to give pure **2** (50 mg, 30%).

Dark-red solid; Mp 207–209 °C; TLC  $R_f = 0.5$  ( $CHCl_3$ );  $^1H$  NMR ( $CDCl_3$ )  $\delta$  0.81–0.85 (m, 12H), 0.90–0.94 (m, 12H), 1.21–1.53 (m, 80H), 1.67–1.71 (m, 8H), 1.85–1.91 (m, 4H), 2.21–2.29 (m, 4H), 2.74–2.83 (m, 8H), 5.15–5.22 (m, 2H), 6.99 (s, 2H), 7.04 (d,  $J = 3.9$  Hz, 2H), 7.08 (d,  $J = 3.9$  Hz, 2H), 7.14 (d, 4H), 7.22 (s, 2H), 7.36 (d,  $J = 8.5$  Hz, 4H), 7.76 (d,  $J = 8.5$  Hz, 4H), 8.61–8.74 (m, 16H); MS (MALDI-TOF, 1,8,9-trihydroxyanthracene matrix)  $m/z$  2458.7 ( $M^+$ , calcd 2456.1); Anal. Calcd for  $C_{154}H_{166}N_4O_8S_8$ : C, 75.27; H, 6.81; N, 2.28; Found: C, 74.89; H, 6.60; N, 2.15.

## Representative NMR Spectra

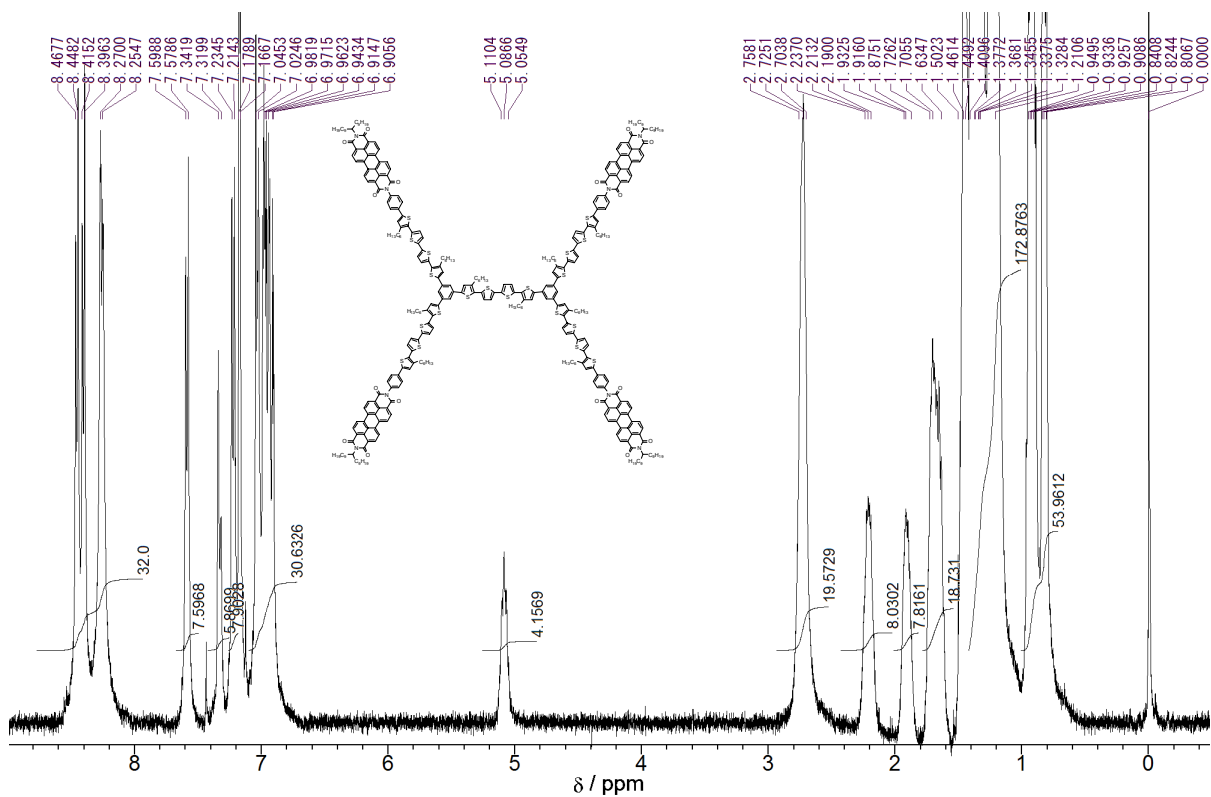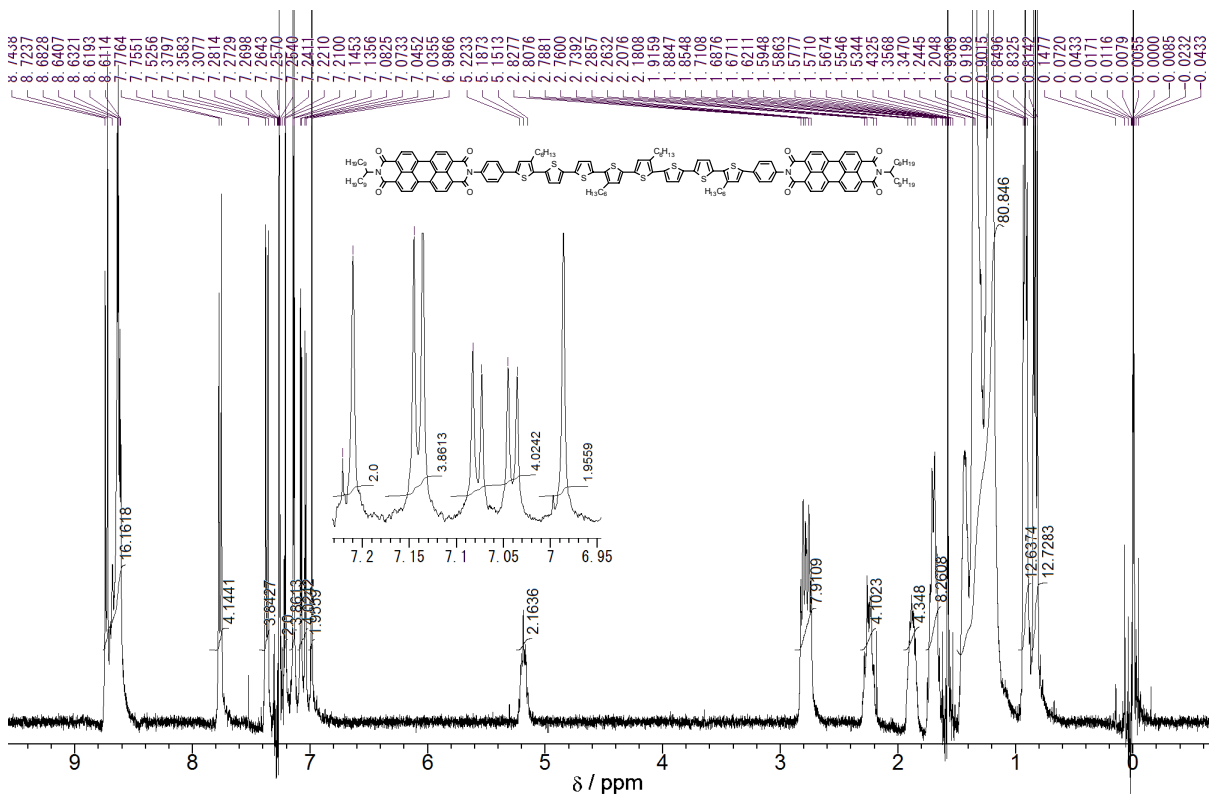

## Computational Details

All calculations were conducted using Gaussian 03 program. The geometry was optimized with the restricted Becke Hybrid (B3LYP) at 6-31 G(d, p) level.

### Optimized structure of **1**

| Center Number | Atomic Number | Atomic Type | Coordinates (Angstroms) |           |           |
|---------------|---------------|-------------|-------------------------|-----------|-----------|
|               |               |             | X                       | Y         | Z         |
| 1             | 6             | 0           | 2.640003                | 0.242961  | -1.164872 |
| 2             | 6             | 0           | 2.011008                | -0.964980 | -0.936351 |
| 3             | 6             | 0           | 0.600849                | -0.874151 | -0.884674 |
| 4             | 6             | 0           | 0.117119                | 0.406144  | -1.071683 |
| 5             | 16            | 0           | 1.447736                | 1.521105  | -1.345747 |
| 6             | 1             | 0           | 2.555607                | -1.889631 | -0.782460 |
| 7             | 1             | 0           | -0.045208               | -1.721951 | -0.686894 |
| 8             | 6             | 0           | -1.248413               | 0.871087  | -1.067388 |
| 9             | 6             | 0           | -1.730194               | 2.163192  | -0.987182 |
| 10            | 16            | 0           | -2.583722               | -0.266180 | -1.177535 |
| 11            | 6             | 0           | -3.141958               | 2.247436  | -0.990779 |
| 12            | 1             | 0           | -1.080876               | 3.026919  | -0.899574 |
| 13            | 6             | 0           | -3.773855               | 1.022410  | -1.074449 |
| 14            | 1             | 0           | -3.684338               | 3.182372  | -0.907195 |
| 15            | 6             | 0           | -5.186443               | 0.723356  | -1.088163 |
| 16            | 6             | 0           | -5.819106               | -0.491772 | -0.915328 |
| 17            | 16            | 0           | -6.374241               | 1.986780  | -1.360966 |
| 18            | 6             | 0           | -7.231384               | -0.412808 | -0.983897 |
| 19            | 1             | 0           | -5.280489               | -1.411321 | -0.715932 |
| 20            | 6             | 0           | -7.709843               | 0.859578  | -1.207995 |
| 21            | 1             | 0           | -7.883179               | -1.265210 | -0.832315 |
| 22            | 6             | 0           | 4.051854                | 0.529352  | -1.263625 |
| 23            | 6             | 0           | 4.698511                | 1.748604  | -1.223528 |
| 24            | 16            | 0           | 5.219436                | -0.764296 | -1.473874 |
| 25            | 6             | 0           | 6.106649                | 1.650017  | -1.341827 |
| 26            | 1             | 0           | 4.174111                | 2.686932  | -1.082071 |
| 27            | 6             | 0           | 6.567490                | 0.358310  | -1.472997 |
| 28            | 1             | 0           | 6.768835                | 2.506317  | -1.289437 |
| 29            | 6             | 0           | 7.951036                | -0.112106 | -1.601084 |
| 30            | 6             | 0           | 8.330909                | -1.386233 | -1.152968 |
| 31            | 6             | 0           | 8.929257                | 0.732285  | -2.149279 |
| 32            | 6             | 0           | 9.658907                | -1.828651 | -1.260909 |
| 33            | 1             | 0           | 7.598616                | -2.022651 | -0.668075 |
| 34            | 6             | 0           | 10.265844               | 0.319756  | -2.257968 |
| 35            | 1             | 0           | 8.648444                | 1.721960  | -2.491098 |
| 36            | 6             | 0           | 10.616164               | -0.965624 | -1.815160 |
| 37            | 1             | 0           | 11.634918               | -1.315560 | -1.948494 |
| 38            | 6             | 0           | -9.103554               | 1.301600  | -1.320727 |
| 39            | 6             | 0           | -9.486059               | 2.607262  | -0.981388 |
| 40            | 6             | 0           | -10.086158              | 0.401268  | -1.765018 |
| 41            | 6             | 0           | -10.824673              | 3.021658  | -1.083220 |
| 42            | 1             | 0           | -8.746859               | 3.294899  | -0.584774 |
| 43            | 6             | 0           | -11.433137              | 0.781060  | -1.850853 |
| 44            | 1             | 0           | -9.789256               | -0.591439 | -2.085625 |
| 45            | 6             | 0           | -11.788404              | 2.095736  | -1.507105 |
| 46            | 1             | 0           | -12.828231              | 2.397882  | -1.571377 |
| 47            | 6             | 0           | -11.194182              | 4.394757  | -0.723867 |
| 48            | 6             | 0           | -10.421190              | 5.533845  | -0.777420 |
| 49            | 16            | 0           | -12.796677              | 4.782433  | -0.124397 |
| 50            | 6             | 0           | -11.098478              | 6.708038  | -0.365308 |
| 51            | 1             | 0           | -9.400247               | 5.532321  | -1.141154 |
| 52            | 6             | 0           | -12.407347              | 6.488257  | 0.015453  |
| 53            | 1             | 0           | -10.646322              | 7.693442  | -0.373108 |
| 54            | 6             | 0           | -13.393428              | 7.432665  | 0.485494  |
| 55            | 6             | 0           | -14.757401              | 7.266876  | 0.623644  |
| 56            | 16            | 0           | -12.925784              | 9.047841  | 0.996211  |
| 57            | 6             | 0           | -15.426327              | 8.413816  | 1.109657  |
| 58            | 1             | 0           | -15.266321              | 6.347689  | 0.356413  |
| 59            | 6             | 0           | -14.589776              | 9.485413  | 1.354394  |
| 60            | 1             | 0           | -16.499982              | 8.464204  | 1.250803  |
| 61            | 6             | 0           | -12.462469              | -0.155926 | -2.313003 |
| 62            | 6             | 0           | -13.662162              | 0.120672  | -2.931555 |
| 63            | 16            | 0           | -12.280044              | -1.887928 | -2.101684 |
| 64            | 6             | 0           | -14.422502              | -1.030598 | -3.252082 |
| 65            | 1             | 0           | -13.972996              | 1.127458  | -3.185125 |
| 66            | 6             | 0           | -13.817677              | -2.215387 | -2.882345 |
| 67            | 1             | 0           | -15.375805              | -0.993537 | -3.767166 |
| 68            | 6             | 0           | -14.288226              | -3.570131 | -3.051596 |
| 69            | 6             | 0           | -13.586051              | -4.754670 | -2.950662 |
| 70            | 16            | 0           | -15.971827              | -3.895624 | -3.435824 |
| 71            | 6             | 0           | -14.373817              | -5.907031 | -3.176585 |
| 72            | 1             | 0           | -12.525072              | -4.790130 | -2.730874 |
| 73            | 6             | 0           | -15.697923              | -5.631977 | -3.458894 |
| 74            | 1             | 0           | -13.981230              | -6.916447 | -3.129210 |
| 75            | 6             | 0           | -16.775555              | -6.547074 | -3.744843 |
| 76            | 6             | 0           | -18.130446              | -6.295977 | -3.841569 |

|     |    |   |            |            |           |
|-----|----|---|------------|------------|-----------|
| 77  | 16 | 0 | -16.455632 | -8.251524  | -4.032735 |
| 78  | 6  | 0 | -18.906210 | -7.444391  | -4.122248 |
| 79  | 1  | 0 | -18.557034 | -5.310461  | -3.692605 |
| 80  | 6  | 0 | -18.164076 | -8.602248  | -4.248187 |
| 81  | 1  | 0 | -19.986704 | -7.428081  | -4.208886 |
| 82  | 6  | 0 | -18.612033 | -9.947049  | -4.521966 |
| 83  | 6  | 0 | -17.912610 | -11.133721 | -4.424189 |
| 84  | 16 | 0 | -20.248907 | -10.257386 | -5.074888 |
| 85  | 6  | 0 | -18.675768 | -12.274354 | -4.772222 |
| 86  | 1  | 0 | -16.883905 | -11.183090 | -4.085238 |
| 87  | 6  | 0 | -19.972889 | -11.989149 | -5.140758 |
| 88  | 1  | 0 | -18.291703 | -13.286143 | -4.716137 |
| 89  | 6  | 0 | -14.922059 | 10.802695  | 1.839842  |
| 90  | 6  | 0 | -14.171407 | 11.961639  | 1.809044  |
| 91  | 16 | 0 | -16.472765 | 11.106811  | 2.608554  |
| 92  | 6  | 0 | -14.828565 | 13.082490  | 2.368452  |
| 93  | 1  | 0 | -13.182194 | 12.007888  | 1.367854  |
| 94  | 6  | 0 | -16.096714 | 12.807418  | 2.841140  |
| 95  | 1  | 0 | -14.392775 | 14.074609  | 2.401711  |
| 96  | 6  | 0 | -17.054816 | 13.693927  | 3.458180  |
| 97  | 6  | 0 | -18.394903 | 13.479929  | 3.713637  |
| 98  | 16 | 0 | -16.582027 | 15.288126  | 4.021216  |
| 99  | 6  | 0 | -19.037436 | 14.576413  | 4.337422  |
| 100 | 1  | 0 | -18.907407 | 12.566100  | 3.434709  |
| 101 | 6  | 0 | -18.208389 | 15.652391  | 4.570390  |
| 102 | 1  | 0 | -20.094715 | 14.589782  | 4.574842  |
| 103 | 6  | 0 | 10.018855  | -3.173058  | -0.799176 |
| 104 | 6  | 0 | 9.226158   | -4.298098  | -0.735810 |
| 105 | 16 | 0 | 11.630927  | -3.537624  | -0.211568 |
| 106 | 6  | 0 | 9.895268   | -5.444926  | -0.242726 |
| 107 | 1  | 0 | 8.196110   | -4.308338  | -1.072695 |
| 108 | 6  | 0 | 11.217486  | -5.217583  | 0.084137  |
| 109 | 1  | 0 | 9.427762   | -6.419215  | -0.155114 |
| 110 | 6  | 0 | 11.260517  | 1.218526   | -2.853440 |
| 111 | 6  | 0 | 11.068625  | 2.214428   | -3.785949 |
| 112 | 16 | 0 | 12.954086  | 1.131574   | -2.404774 |
| 113 | 6  | 0 | 12.256440  | 2.891614   | -4.155901 |
| 114 | 1  | 0 | 10.101153  | 2.427309   | -4.225627 |
| 115 | 6  | 0 | 13.384214  | 2.425719   | -3.509700 |
| 116 | 1  | 0 | 12.289094  | 3.680619   | -4.898791 |
| 117 | 6  | 0 | 12.196371  | -6.139413  | 0.610865  |
| 118 | 6  | 0 | 13.567203  | -5.998325  | 0.699030  |
| 119 | 16 | 0 | 11.703910  | -7.689087  | 1.276949  |
| 120 | 6  | 0 | 14.221213  | -7.115040  | 1.269639  |
| 121 | 1  | 0 | 14.090652  | -5.120646  | 0.337089  |
| 122 | 6  | 0 | 13.365733  | -8.137619  | 1.630605  |
| 123 | 1  | 0 | 15.296774  | -7.180999  | 1.388306  |
| 124 | 6  | 0 | 13.673221  | -9.415150  | 2.226449  |
| 125 | 6  | 0 | 12.885795  | -10.546268 | 2.317365  |
| 126 | 16 | 0 | 15.229596  | -9.698629  | 2.991622  |
| 127 | 6  | 0 | 13.518381  | -11.631560 | 2.967205  |
| 128 | 1  | 0 | 11.886663  | -10.599773 | 1.900020  |
| 129 | 6  | 0 | 14.804125  | -11.356357 | 3.389280  |
| 130 | 1  | 0 | 13.053060  | -12.601576 | 3.100491  |
| 131 | 6  | 0 | 15.740704  | -12.214187 | 4.076465  |
| 132 | 6  | 0 | 17.100531  | -12.053366 | 4.254051  |
| 133 | 16 | 0 | 15.201718  | -13.690076 | 4.858568  |
| 134 | 6  | 0 | 17.705450  | -13.100281 | 4.991366  |
| 135 | 1  | 0 | 17.651850  | -11.216642 | 3.839930  |
| 136 | 6  | 0 | 16.826620  | -14.083856 | 5.391099  |
| 137 | 1  | 0 | 18.769558  | -13.149089 | 5.190957  |
| 138 | 6  | 0 | 14.753077  | 2.868238   | -3.635084 |
| 139 | 6  | 0 | 15.912104  | 2.245722   | -3.215845 |
| 140 | 16 | 0 | 15.133685  | 4.403857   | -4.399754 |
| 141 | 6  | 0 | 17.089848  | 2.968910   | -3.516029 |
| 142 | 1  | 0 | 15.913801  | 1.278078   | -2.726998 |
| 143 | 6  | 0 | 16.859680  | 4.162052   | -4.173018 |
| 144 | 1  | 0 | 18.086021  | 2.611808   | -3.280699 |
| 145 | 6  | 0 | 17.809189  | 5.141972   | -4.641297 |
| 146 | 6  | 0 | 17.616254  | 6.193027   | -5.516566 |
| 147 | 16 | 0 | 19.477806  | 5.112907   | -4.090190 |
| 148 | 6  | 0 | 18.783391  | 6.952597   | -5.763206 |
| 149 | 1  | 0 | 16.661856  | 6.394123   | -5.989878 |
| 150 | 6  | 0 | 19.896842  | 6.501109   | -5.082422 |
| 151 | 1  | 0 | 18.815071  | 7.795072   | -6.444708 |
| 152 | 6  | 0 | 21.245115  | 7.017687   | -5.097302 |
| 153 | 6  | 0 | 22.411571  | 6.419867   | -4.663071 |
| 154 | 16 | 0 | 21.585951  | 8.624482   | -5.715392 |
| 155 | 6  | 0 | 23.562362  | 7.226655   | -4.835774 |
| 156 | 1  | 0 | 22.440578  | 5.414741   | -4.257568 |
| 157 | 6  | 0 | 23.305047  | 8.455160   | -5.405655 |
| 158 | 1  | 0 | 24.562737  | 6.896173   | -4.581887 |
| 159 | 6  | 0 | 24.248791  | 9.527203   | -5.730801 |
| 160 | 6  | 0 | 23.974685  | 10.474821  | -6.733635 |
| 161 | 6  | 0 | 25.469043  | 9.633090   | -5.036797 |
| 162 | 6  | 0 | 24.878942  | 11.488779  | -7.028780 |
| 163 | 1  | 0 | 23.052160  | 10.407135  | -7.301781 |
| 164 | 6  | 0 | 26.382050  | 10.635066  | -5.342534 |
| 165 | 1  | 0 | 25.693038  | 8.936827   | -4.235705 |
| 166 | 6  | 0 | 26.086340  | 11.567738  | -6.336641 |
| 167 | 1  | 0 | 24.655986  | 12.209681  | -7.807532 |
| 168 | 1  | 0 | 27.315442  | 10.709150  | -4.795553 |



|     |   |   |            |            |            |
|-----|---|---|------------|------------|------------|
| 169 | 6 | 0 | -21.029962 | -12.917618 | -5.548699  |
| 170 | 6 | 0 | -22.391812 | -12.609194 | -5.379093  |
| 171 | 6 | 0 | -20.698688 | -14.159282 | -6.123398  |
| 172 | 6 | 0 | -23.383036 | -13.503944 | -5.767054  |
| 173 | 1 | 0 | -22.678100 | -11.668203 | -4.919769  |
| 174 | 6 | 0 | -21.687504 | -15.061494 | -6.496468  |
| 175 | 1 | 0 | -19.657542 | -14.409051 | -6.297782  |
| 176 | 6 | 0 | -23.031702 | -14.733544 | -6.321200  |
| 177 | 1 | 0 | -24.429336 | -13.256508 | -5.624978  |
| 178 | 1 | 0 | -21.419471 | -16.013440 | -6.941766  |
| 179 | 6 | 0 | -18.541500 | 16.940357  | 5.183860   |
| 180 | 6 | 0 | -17.825156 | 18.112680  | 4.882440   |
| 181 | 6 | 0 | -19.608628 | 17.031971  | 6.097366   |
| 182 | 6 | 0 | -18.162500 | 19.328729  | 5.467014   |
| 183 | 1 | 0 | -17.009847 | 18.076704  | 4.166614   |
| 184 | 6 | 0 | -19.956983 | 18.248941  | 6.670121   |
| 185 | 1 | 0 | -20.155249 | 16.136874  | 6.374476   |
| 186 | 6 | 0 | -19.232626 | 19.398958  | 6.356950   |
| 187 | 1 | 0 | -17.607339 | 20.227142  | 5.220401   |
| 188 | 1 | 0 | -20.779222 | 18.306452  | 7.375126   |
| 189 | 6 | 0 | 17.105642  | -15.300777 | 6.157484   |
| 190 | 6 | 0 | 16.299497  | -16.447783 | 6.043868   |
| 191 | 6 | 0 | 18.203762  | -15.347251 | 7.036977   |
| 192 | 6 | 0 | 16.576155  | -17.593891 | 6.781070   |
| 193 | 1 | 0 | 15.458508  | -16.449345 | 5.357450   |
| 194 | 6 | 0 | 18.491525  | -16.497315 | 7.761968   |
| 195 | 1 | 0 | 18.822235  | -14.465940 | 7.169374   |
| 196 | 6 | 0 | 17.675056  | -17.621211 | 7.637975   |
| 197 | 1 | 0 | 15.949102  | -18.473049 | 6.681004   |
| 198 | 1 | 0 | 19.336736  | -16.518679 | 8.441199   |
| 199 | 7 | 0 | -19.596969 | 20.662461  | 6.956132   |
| 200 | 6 | 0 | -20.204590 | 21.628339  | 6.124996   |
| 201 | 6 | 0 | -19.331802 | 20.834465  | 8.331874   |
| 202 | 6 | 0 | -20.598076 | 22.904291  | 6.770659   |
| 203 | 8 | 0 | -20.392952 | 21.408267  | 4.939397   |
| 204 | 6 | 0 | -19.735203 | 22.131765  | 8.927102   |
| 205 | 8 | 0 | -18.800847 | 19.950471  | 8.984701   |
| 206 | 6 | 0 | -21.211714 | 23.882332  | 6.007223   |
| 207 | 6 | 0 | -20.361519 | 23.134200  | 8.147577   |
| 208 | 6 | 0 | -19.497250 | 22.356857  | 10.271927  |
| 209 | 6 | 0 | -21.602119 | 25.093578  | 6.587204   |
| 210 | 1 | 0 | -21.383272 | 23.687216  | 4.954416   |
| 211 | 6 | 0 | -20.753742 | 24.371156  | 8.747742   |
| 212 | 6 | 0 | -19.873685 | 23.565745  | 10.865921  |
| 213 | 1 | 0 | -19.015999 | 21.576646  | 10.851203  |
| 214 | 6 | 0 | -21.391872 | 25.365891  | 7.940400   |
| 215 | 1 | 0 | -22.079843 | 25.828209  | 5.950926   |
| 216 | 6 | 0 | -20.499095 | 24.581549  | 10.140316  |
| 217 | 1 | 0 | -19.667469 | 23.696740  | 11.920932  |
| 218 | 6 | 0 | -21.804768 | 26.634046  | 8.559951   |
| 219 | 6 | 0 | -20.904161 | 25.853072  | 10.758034  |
| 220 | 6 | 0 | -21.549264 | 26.844316  | 9.952356   |
| 221 | 6 | 0 | -22.441898 | 27.644880  | 7.837436   |
| 222 | 6 | 0 | -20.684433 | 26.130201  | 12.108755  |
| 223 | 6 | 0 | -21.950172 | 28.076863  | 10.554587  |
| 224 | 6 | 0 | -22.832124 | 28.847959  | 8.435090   |
| 225 | 1 | 0 | -22.650576 | 27.512834  | 6.783020   |
| 226 | 6 | 0 | -21.078744 | 27.340070  | 12.689611  |
| 227 | 1 | 0 | -20.196670 | 25.400243  | 12.742831  |
| 228 | 6 | 0 | -21.707752 | 28.311045  | 11.929930  |
| 229 | 6 | 0 | -22.593137 | 29.071903  | 9.779470   |
| 230 | 1 | 0 | -23.326567 | 29.622706  | 7.859475   |
| 231 | 1 | 0 | -20.900620 | 27.537815  | 13.740802  |
| 232 | 6 | 0 | -22.117216 | 29.582646  | 12.576149  |
| 233 | 6 | 0 | -23.016469 | 30.354370  | 10.390460  |
| 234 | 7 | 0 | -22.751881 | 30.526984  | 11.754698  |
| 235 | 8 | 0 | -21.916031 | 29.803505  | 13.762949  |
| 236 | 8 | 0 | -23.574253 | 31.238222  | 9.753473   |
| 237 | 6 | 0 | -23.177899 | 31.800918  | 12.345025  |
| 238 | 1 | 0 | -22.918860 | 31.779562  | 13.400316  |
| 239 | 1 | 0 | -24.254519 | 31.925980  | 12.213928  |
| 240 | 1 | 0 | -22.673957 | 32.628770  | 11.841900  |
| 241 | 7 | 0 | -24.059634 | -15.669227 | -6.716036  |
| 242 | 6 | 0 | -24.256426 | -15.879840 | -8.097962  |
| 243 | 6 | 0 | -24.789565 | -16.309038 | -5.690915  |
| 244 | 6 | 0 | -25.315084 | -16.847207 | -8.476374  |
| 245 | 8 | 0 | -23.581508 | -15.289665 | -8.926064  |
| 246 | 6 | 0 | -25.831945 | -17.272155 | -6.121892  |
| 247 | 8 | 0 | -24.561965 | -16.072101 | -4.515489  |
| 248 | 6 | 0 | -25.555615 | -17.089085 | -9.817831  |
| 249 | 6 | 0 | -26.077217 | -17.523783 | -7.493486  |
| 250 | 6 | 0 | -26.574155 | -17.934237 | -5.159253  |
| 251 | 6 | 0 | -26.544973 | -17.997142 | -10.208399 |
| 252 | 1 | 0 | -24.961147 | -16.560542 | -10.554797 |
| 253 | 6 | 0 | -27.088337 | -18.456173 | -7.883815  |
| 254 | 6 | 0 | -27.563134 | -18.850001 | -5.532301  |
| 255 | 1 | 0 | -26.371118 | -17.727272 | -4.114337  |
| 256 | 6 | 0 | -27.320202 | -18.690251 | -9.276668  |
| 257 | 1 | 0 | -26.697448 | -18.153648 | -11.269054 |
| 258 | 6 | 0 | -27.841828 | -19.131067 | -6.871280  |
| 259 | 1 | 0 | -28.118037 | -19.344106 | -4.744474  |
| 260 | 6 | 0 | -28.361140 | -19.648300 | -9.678137  |

|     |   |   |            |            |            |
|-----|---|---|------------|------------|------------|
| 261 | 6 | 0 | -28.878704 | -20.093479 | -7.272526  |
| 262 | 6 | 0 | -29.111816 | -20.325729 | -8.665223  |
| 263 | 6 | 0 | -28.645391 | -19.923896 | -11.017181 |
| 264 | 6 | 0 | -29.648338 | -20.793091 | -6.341008  |
| 265 | 6 | 0 | -30.121090 | -21.259447 | -9.055207  |
| 266 | 6 | 0 | -29.635952 | -20.838541 | -11.390176 |
| 267 | 1 | 0 | -28.094295 | -19.425775 | -11.805179 |
| 268 | 6 | 0 | -30.633381 | -21.706150 | -6.731666  |
| 269 | 1 | 0 | -29.493581 | -20.639437 | -5.280248  |
| 270 | 6 | 0 | -30.876644 | -21.944781 | -8.073059  |
| 271 | 6 | 0 | -30.371970 | -21.505327 | -10.426679 |
| 272 | 1 | 0 | -29.843948 | -21.040947 | -12.435083 |
| 273 | 1 | 0 | -31.221763 | -22.241015 | -5.994433  |
| 274 | 6 | 0 | -31.928880 | -22.918968 | -8.455111  |
| 275 | 6 | 0 | -31.415875 | -22.470501 | -10.846176 |
| 276 | 7 | 0 | -32.130414 | -23.116536 | -9.829703  |
| 277 | 8 | 0 | -32.590867 | -23.521961 | -7.620861  |
| 278 | 8 | 0 | -31.661799 | -22.709755 | -12.021045 |
| 279 | 6 | 0 | -33.160912 | -24.067817 | -10.260932 |
| 280 | 1 | 0 | -33.634647 | -24.469290 | -9.368967  |
| 281 | 1 | 0 | -32.704198 | -24.867960 | -10.847173 |
| 282 | 1 | 0 | -33.892529 | -23.557892 | -10.890700 |
| 283 | 7 | 0 | 17.965025  | -18.811768 | 8.403947   |
| 284 | 6 | 0 | 18.439164  | -19.941871 | 7.703426   |
| 285 | 6 | 0 | 17.752507  | -18.758658 | 9.798676   |
| 286 | 6 | 0 | 18.731375  | -21.149312 | 8.513932   |
| 287 | 8 | 0 | 18.595314  | -19.911386 | 6.493330   |
| 288 | 6 | 0 | 18.052264  | -19.994338 | 10.562242  |
| 289 | 8 | 0 | 17.343164  | -17.741053 | 10.333819  |
| 290 | 6 | 0 | 19.205516  | -22.285136 | 7.880676   |
| 291 | 6 | 0 | 18.533848  | -21.158390 | 9.915919   |
| 292 | 6 | 0 | 17.855517  | -20.001594 | 11.932311  |
| 293 | 6 | 0 | 19.490598  | -23.440196 | 8.615920   |
| 294 | 1 | 0 | 19.349929  | -22.258175 | 6.806284   |
| 295 | 6 | 0 | 18.819191  | -22.336002 | 10.674832  |
| 296 | 6 | 0 | 18.128614  | -21.150387 | 12.681679  |
| 297 | 1 | 0 | 17.486497  | -19.099805 | 12.408231  |
| 298 | 6 | 0 | 19.310469  | -23.498272 | 9.999283   |
| 299 | 1 | 0 | 19.859906  | -24.304115 | 8.077427   |
| 300 | 6 | 0 | 18.606173  | -22.321458 | 12.090014  |
| 301 | 1 | 0 | 17.959204  | -21.109203 | 13.750479  |
| 302 | 6 | 0 | 19.607781  | -24.708321 | 10.780380  |
| 303 | 6 | 0 | 18.895998  | -23.533852 | 12.870078  |
| 304 | 6 | 0 | 19.391017  | -24.694523 | 12.195005  |
| 305 | 6 | 0 | 20.095608  | -25.876219 | 10.190588  |
| 306 | 6 | 0 | 18.705778  | -23.595648 | 14.251934  |
| 307 | 6 | 0 | 19.676472  | -25.871504 | 12.953876  |
| 308 | 6 | 0 | 20.373724  | -27.023541 | 10.941088  |
| 309 | 1 | 0 | 20.270914  | -25.915602 | 9.122642   |
| 310 | 6 | 0 | 18.986603  | -24.752343 | 14.986637  |
| 311 | 1 | 0 | 18.330178  | -22.733962 | 14.789680  |
| 312 | 6 | 0 | 19.468524  | -25.885328 | 14.354510  |
| 313 | 6 | 0 | 20.169220  | -27.031879 | 12.309566  |
| 314 | 1 | 0 | 20.752167  | -27.922466 | 10.466973  |
| 315 | 1 | 0 | 18.832960  | -24.782098 | 16.059638  |
| 316 | 6 | 0 | 19.758186  | -27.096325 | 15.161962  |
| 317 | 6 | 0 | 20.470603  | -28.259712 | 13.083454  |
| 318 | 7 | 0 | 20.244238  | -28.212839 | 14.464564  |
| 319 | 8 | 0 | 19.584842  | -27.127607 | 16.373043  |
| 320 | 8 | 0 | 20.898621  | -29.281379 | 12.562810  |
| 321 | 6 | 0 | 20.547333  | -29.435991 | 15.216133  |
| 322 | 1 | 0 | 20.316072  | -29.248036 | 16.261318  |
| 323 | 1 | 0 | 21.601823  | -29.692324 | 15.095085  |
| 324 | 1 | 0 | 19.948288  | -30.263563 | 14.831012  |
| 325 | 7 | 0 | 27.026854  | 12.620650  | -6.643939  |
| 326 | 6 | 0 | 27.237516  | 13.616148  | -5.664598  |
| 327 | 6 | 0 | 27.664116  | 12.583571  | -7.903505  |
| 328 | 6 | 0 | 28.195494  | 14.694234  | -6.010096  |
| 329 | 8 | 0 | 26.653307  | 13.578760  | -4.593669  |
| 330 | 6 | 0 | 28.616508  | 13.682034  | -8.197885  |
| 331 | 8 | 0 | 27.431960  | 11.688130  | -8.699747  |
| 332 | 6 | 0 | 28.433715  | 15.700854  | -5.090320  |
| 333 | 6 | 0 | 28.863291  | 14.711775  | -7.258262  |
| 334 | 6 | 0 | 29.270364  | 13.695237  | -9.417855  |
| 335 | 6 | 0 | 29.328966  | 16.733890  | -5.385690  |
| 336 | 1 | 0 | 27.911767  | 15.670032  | -4.140330  |
| 337 | 6 | 0 | 29.781065  | 15.763377  | -7.568109  |
| 338 | 6 | 0 | 30.170774  | 14.719328  | -9.728563  |
| 339 | 1 | 0 | 29.067695  | 12.897271  | -10.123574 |
| 340 | 6 | 0 | 30.011410  | 16.794139  | -6.602330  |
| 341 | 1 | 0 | 29.483092  | 17.499319  | -4.635249  |
| 342 | 6 | 0 | 30.444394  | 15.757787  | -8.836284  |
| 343 | 1 | 0 | 30.658542  | 14.688281  | -10.694906 |
| 344 | 6 | 0 | 30.953616  | 17.877010  | -6.922151  |
| 345 | 6 | 0 | 31.386618  | 16.840584  | -9.156249  |
| 346 | 6 | 0 | 31.615571  | 17.871930  | -8.191050  |
| 347 | 6 | 0 | 31.226964  | 18.915749  | -6.030006  |
| 348 | 6 | 0 | 32.068855  | 16.901554  | -10.372974 |
| 349 | 6 | 0 | 32.529745  | 18.925502  | -8.502563  |
| 350 | 6 | 0 | 32.123356  | 19.943118  | -6.342949  |
| 351 | 1 | 0 | 30.740855  | 18.945497  | -5.062772  |
| 352 | 6 | 0 | 32.962117  | 17.936411  | -10.669406 |

|     |   |   |           |           |            |
|-----|---|---|-----------|-----------|------------|
| 353 | 1 | 0 | 31.915810 | 16.135581 | -11.123123 |
| 354 | 6 | 0 | 33.197852 | 18.944539 | -9.750919  |
| 355 | 6 | 0 | 32.773125 | 19.957448 | -7.564514  |
| 356 | 1 | 0 | 32.324436 | 20.742684 | -5.638466  |
| 357 | 1 | 0 | 33.483334 | 17.967455 | -11.619766 |
| 358 | 6 | 0 | 34.150416 | 20.028938 | -10.095776 |
| 359 | 6 | 0 | 33.718196 | 21.056911 | -7.873703  |
| 360 | 7 | 0 | 34.346955 | 21.022609 | -9.124518  |
| 361 | 8 | 0 | 34.737255 | 20.062217 | -11.169213 |
| 362 | 8 | 0 | 33.955224 | 21.965508 | -7.088642  |
| 363 | 6 | 0 | 35.278117 | 22.118343 | -9.416191  |
| 364 | 1 | 0 | 35.671749 | 21.960359 | -10.416855 |
| 365 | 1 | 0 | 36.085914 | 22.123222 | -8.681433  |
| 366 | 1 | 0 | 34.753868 | 23.073971 | -9.353716  |

**Fig. S1** Calculated HOMO (a) and LUMO (b) of **1**.

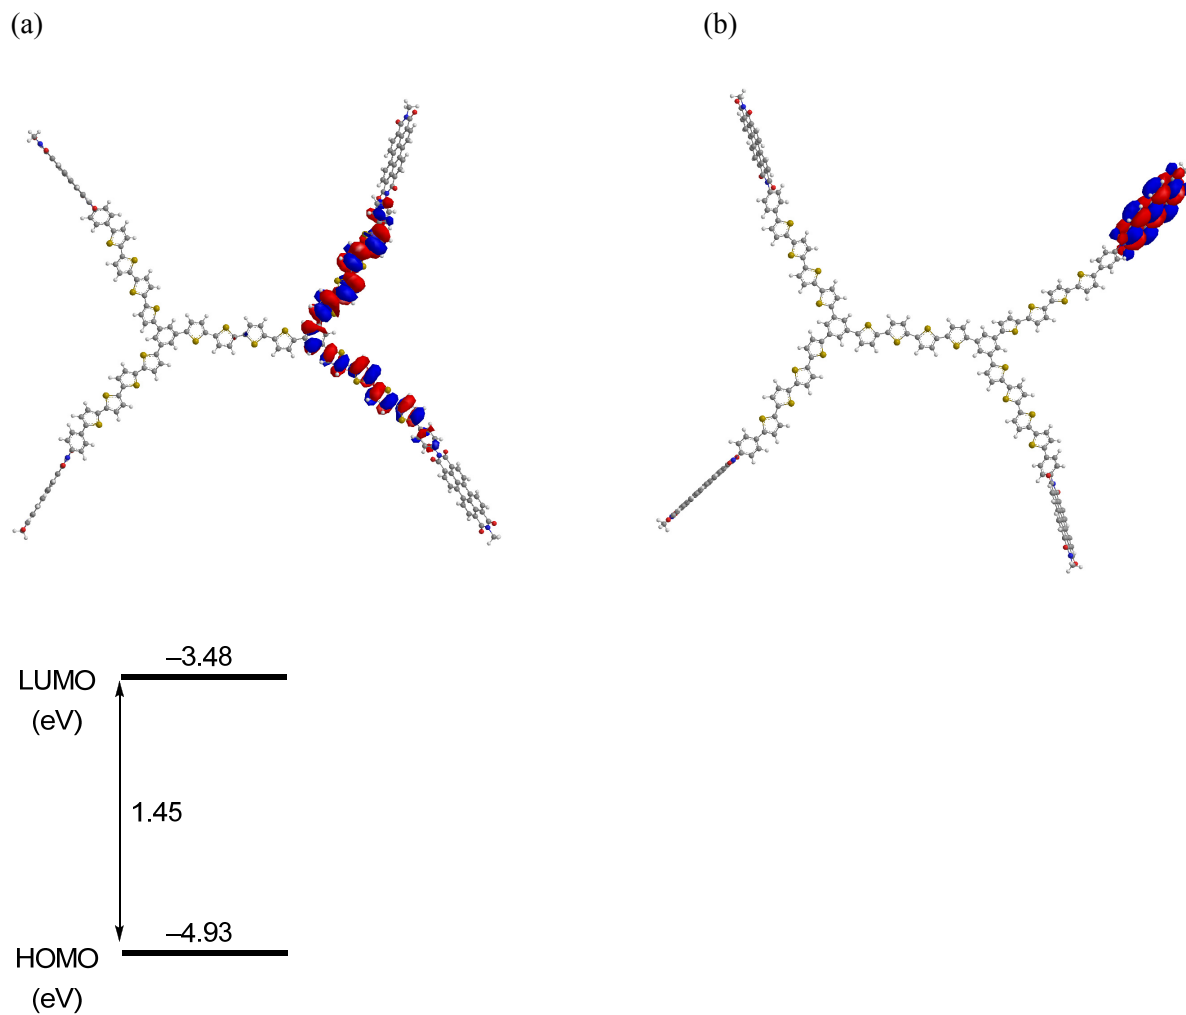

## UV-vis Absorption Spectra

**Fig. S2** UV-vis spectra of dendritic oligothiophene, **1**, and **3** in  $\text{CHCl}_3$ .

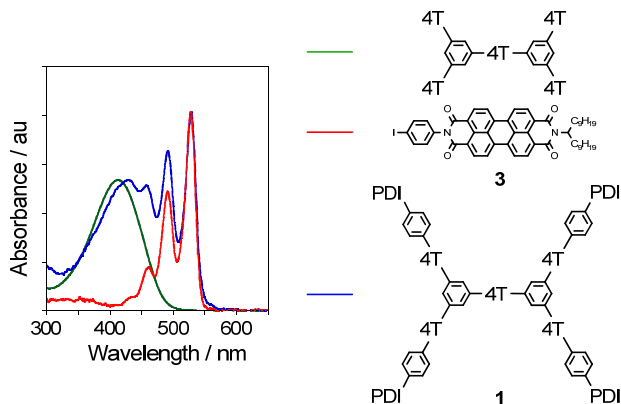

## MALDI-TOF mass

**Fig. S3** MALDI-TOF mass spectrum of **1**.

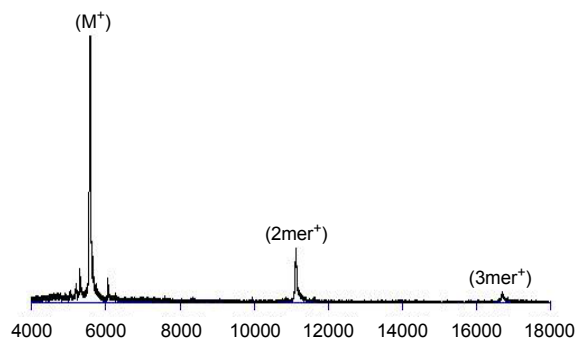

## Device Fabrication

Photovoltaic cells with the structure of ITO/active layer (**1** or **2**)/Al were fabricated. ITO-coated glass substrates were first cleaned by successive ultrasonications in toluene, acetone, H<sub>2</sub>O, and *i*-PrOH. ITO-coated glass substrates were then activated by ozone treatment for 1 h. The active layers were prepared by spin-coating the 1.0 wt% chloroform solution at 1500 rpm for 2 min. The substrates were dried at room temperature for 20 min in ambient air condition and then stored under vacuum ( $1.0 \times 10^{-3}$  Pa). An Al electrode (100 nm) was deposited through a shadow mask to define the active area of the devices ( $0.5 \times 1.0$  mm<sup>2</sup>).

The thickness of active layer was determined by Otsuka Electronics Co., Ltd. FE-3000 reflective film thickness monitor. Monochromic light was produced by a MORITEX MME-250 light source and a Jasco CT-10 monochromator. The current–voltage characteristics of photovoltaic cells were measured by using a KEITHLEY 2400 semiconductor parameter analyzer. All the photovoltaic properties were evaluated in ambient air condition at room temperature and are summarized in Table S1.

**Table S1.** Photovoltaic performances of **1** and **2** as active layers<sup>a</sup>

| run | compd    | $J_{sc}$<br>/nA m <sup>-2</sup> | $\lambda_{inc}$<br>/nm | IPCE<br>/% | $V_{oc}$<br>/V | $FF$ | $\eta$<br>/% |
|-----|----------|---------------------------------|------------------------|------------|----------------|------|--------------|
| 1   | <b>1</b> | 204                             | 470                    | 5.5        | 0.46           | 0.27 | 0.25         |
| 2   | <b>1</b> | 185                             | 470                    | 5.0        | 0.45           | 0.28 | 0.24         |
| 3   | <b>1</b> | 163                             | 470                    | 4.4        | 0.46           | 0.27 | 0.21         |
| 4   | <b>2</b> | 25                              | 460                    | 0.67       | 0.22           | 0.26 | 0.014        |
| 5   | <b>2</b> | 17                              | 460                    | 0.45       | 0.24           | 0.25 | 0.010        |
| 6   | <b>2</b> | 29                              | 460                    | 0.76       | 0.13           | 0.21 | 0.008        |

<sup>a</sup> Upon illumination with  $10\text{-}\mu\text{W cm}^{-2}$  monochromatic light.

### AFM Images

**Fig. S4** AFM images of the spin-coated films of **1** (a) and **2** (b).

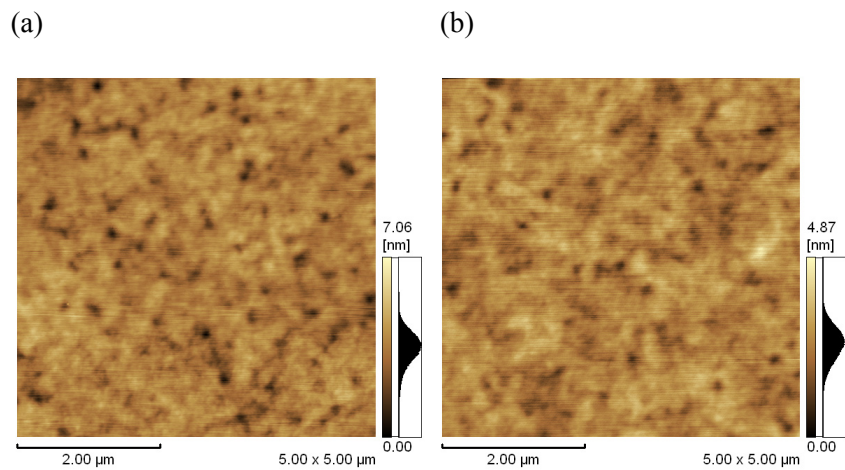

### References

- (1) Wescott, L. D.; Mattern, D. L. *J. Org. Chem.* **2003**, *68*, 10058–10066.
- (2) Sato, M.-A.; Fukui, K. *Synth. Met.* **2007**, *157*, 619–626.
